# Supplementary material for: Organic–inorganic hybrid polymers containing 3,4-ethylenedioxythiophene and chalcogens in the main chain
Source: Royal Society of Chemistry journal article supplement (doi:10.1039/b606346b), 2006-01-01
Supplement: b606346b.pdf [file b606346b.pdf]

### Supplementary Information

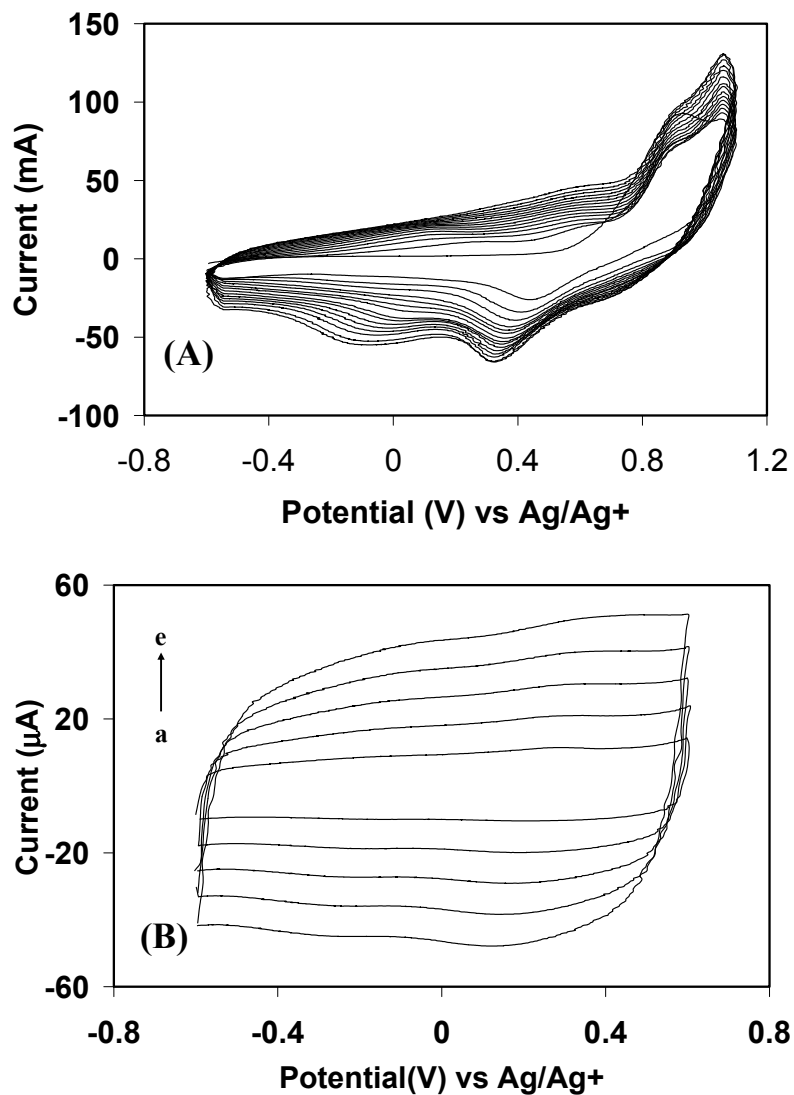

**Figure S1:** (A) Potentiodynamic electropolymerization of 0.02 M solution of **BEDOT-Se<sub>2</sub>** at a scan rate of 100 mV s<sup>-1</sup> in 0.1 M TBAP/DCM. (B) Scan rate dependence of **PBEDOT-Se<sub>2</sub>** in 0.1 M TBAP/DCM: a) 50 mV s<sup>-1</sup>, b) 100 mV s<sup>-1</sup>, c) 150 mV s<sup>-1</sup>, d) 200 mV s<sup>-1</sup>, e) 250 mV s<sup>-1</sup>.

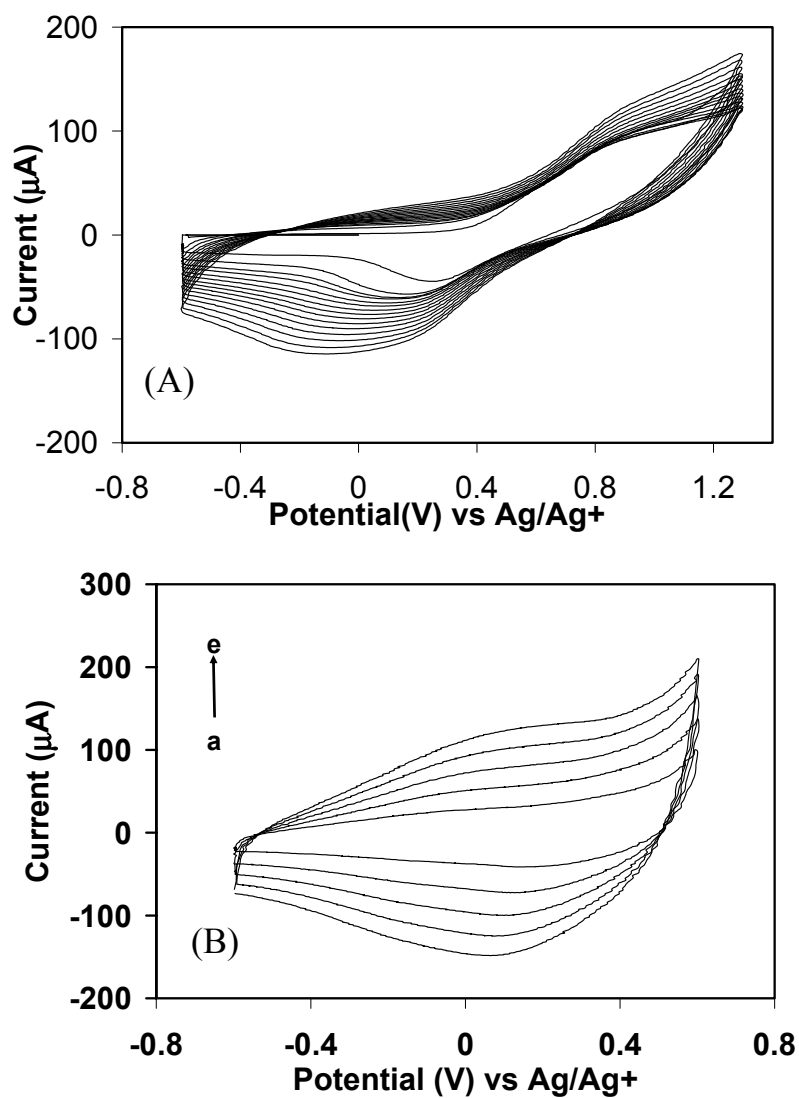

**Figure S2:** (A) Potentiodynamic electropolymerization of 0.02 M solution of **BEDOT-Te<sub>2</sub>** at a scan rate of 100 mV s<sup>-1</sup> in 0.1 M TBAP/DCM. (B) Scan rate dependence of **PBEDOT-Te<sub>2</sub>** in 0.1 M TBAP/DCM: a) 50 mV s<sup>-1</sup>, b) 100 mV s<sup>-1</sup>, c) 150 mV s<sup>-1</sup>, d) 200 mV s<sup>-1</sup>, e) 250 mV s<sup>-1</sup>.

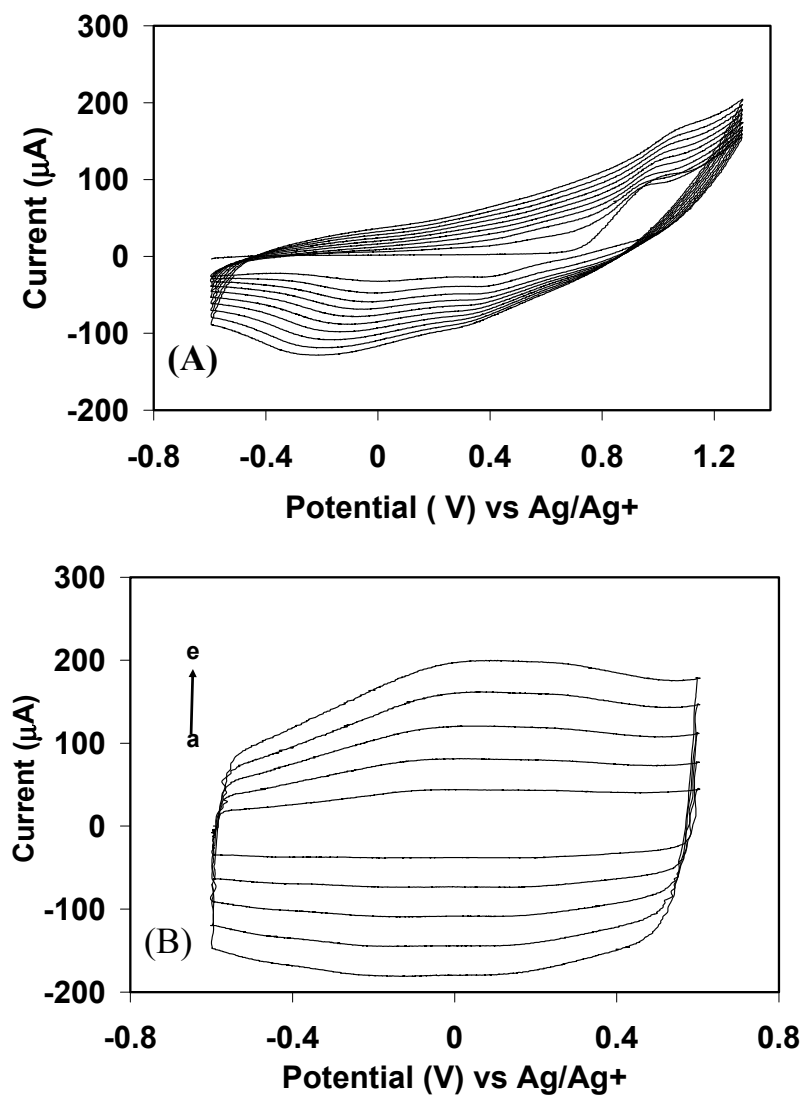

**Figure S3:** (A) Potentiodynamic electropolymerization of 0.02 M solution of **BEDOT-Te** at a scan rate of 100 mV s<sup>-1</sup> in 0.1 M TBAP/DCM. (B) Scan rate dependence of **PBEDOT-Te** in 0.1 M TBAP/DCM: a) 50 mV s<sup>-1</sup>, b) 100 mVs<sup>-1</sup>, c) 150 mV s<sup>-1</sup>, d) 200 mV s<sup>-1</sup>, e) 250 mV s<sup>-1</sup>.

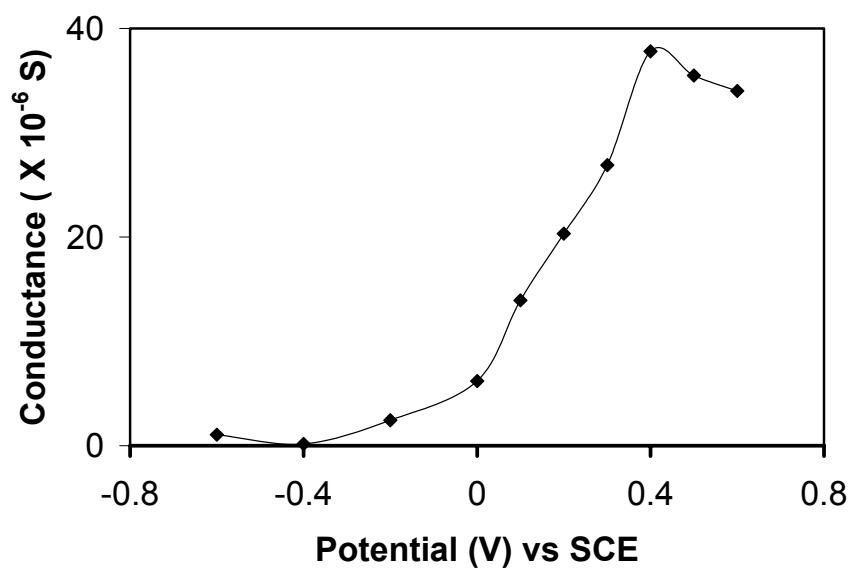

**Figure S4:** *In situ* conductance as a function of applied potential for **P BEDOT-S<sub>2</sub>** in 0.1 M TBAP in DCM.

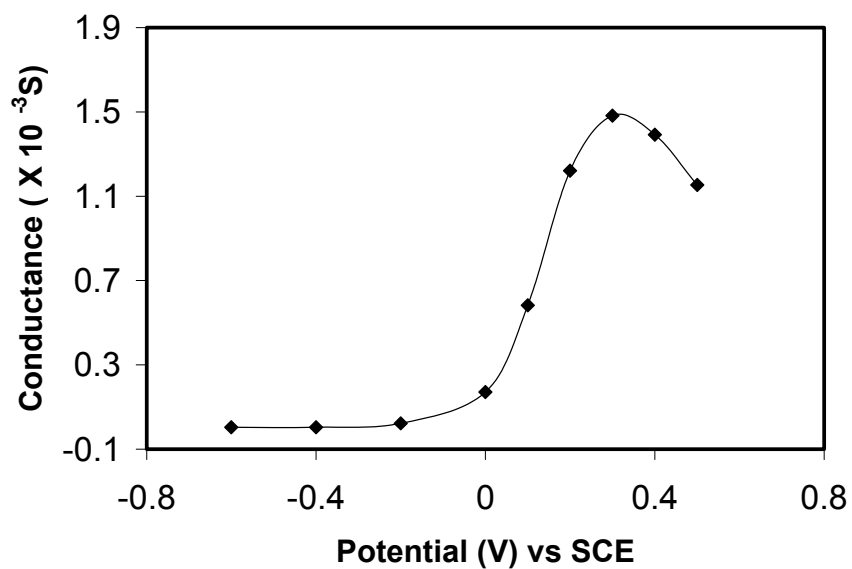

**Figure S5:** *In situ* conductance as a function of applied potential for **PBEDOT-Te<sub>2</sub>** in 0.1 M TBAP in DCM.

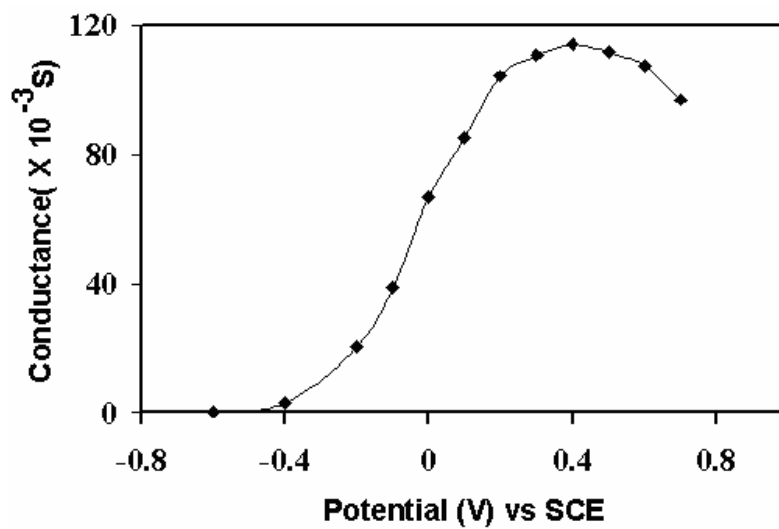

**Figure S6:** *In situ* conductance as a function of applied potential for **PBEDOT-Se** in 0.1 M TBAP in DCM.

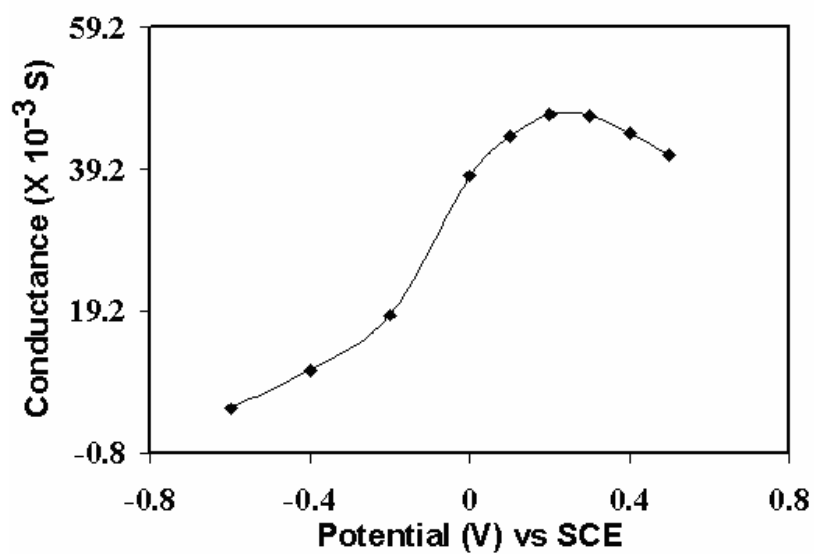

**Figure S7:** In situ conductance as a function of applied potential for **PBEDOT-Te** in 0.1 M TBAP in DCM.

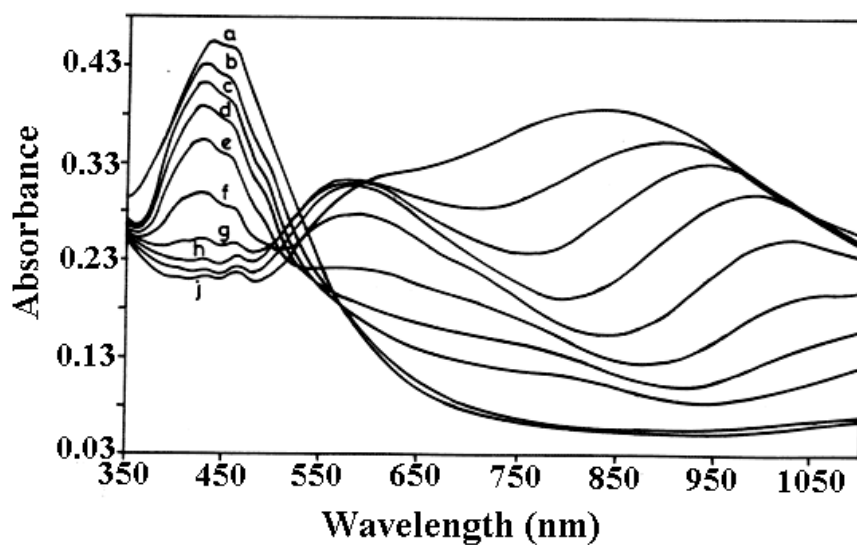

**Figure S8:** Spectroelectrochemistry of **PBEDOT-Se<sub>2</sub> (P157)** in 0.1 M TBAP/DCM as a function of applied potentials; a) -1 V, b) -0.4 V, c) 0.3 V, d) 0.4 V, e) 0.5 V, f) 0.6 V, g) 0.7 V, h) 0.8 V, i) 0.9 V, j) 1.0 V.



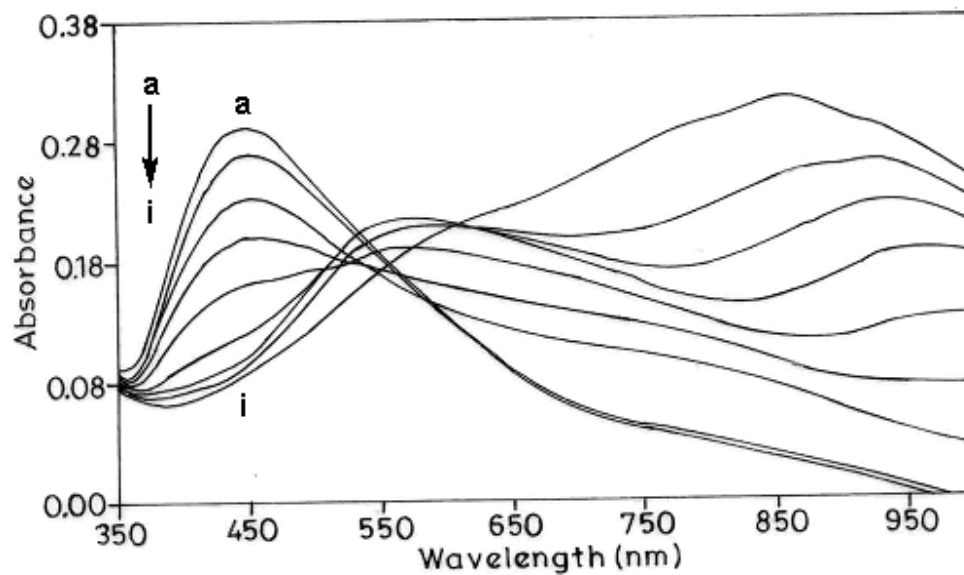

**Figure S9:** Spectroelectrochemistry of **PBEDOT-Te** in 0.1 M TBAP/DCM as a function of applied potentials. a) -1 V, (b) -0.4 V, c) 0.1 V, d) 0.2 V, e) 0.3 V, f) 0.4 V, g) 0.5 V, h) 0.6 V, i) 1.0 V.

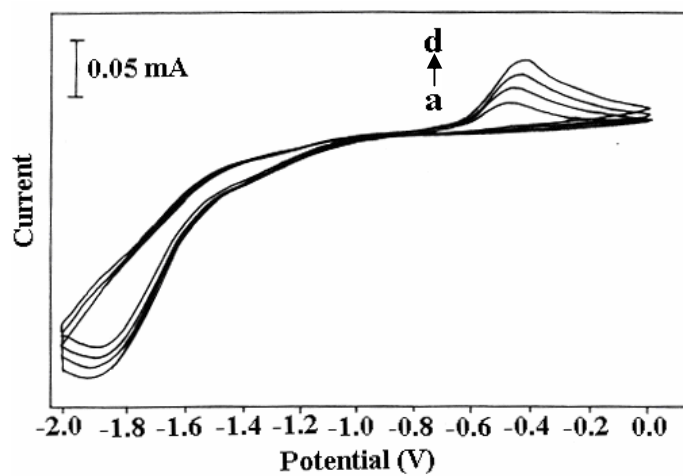

**Figure S10:** Cyclic voltammograms (between -2.0 and 0.0 V) of **PBEDOT-S<sub>2</sub>** in 0.1 M TBAP/DCM at various scan rates: a) 100 mV s<sup>-1</sup>, b) 200 mV s<sup>-1</sup>, c) 300 mV s<sup>-1</sup>, d) 400 mV s<sup>-1</sup>.
